# Supplementary material
Source: HighWire-hosted journal article supplement (https://cmaj.ca/content/suppl/2014/12/09/cmaj.141128)
Supplement: 186_14.pdf [file 186_14.pdf]

## ÉDITORIAL

## La dépression mérite d'être mieux traitée

Kirsten Patrick MBBCh DA

Pour la version anglaise de l'éditorial, veuillez consulter la page 1043.

Les perceptions du public face à la dépression sont souvent assorties de croyances déconcertantes et erronées. Prenons seulement comme exemple les réactions au suicide récent de Robin Williams, qu'on a pu lire dans les médias sociaux. Je constate avec étonnement qu'on perçoit souvent la dépression comme un manque (« ayez une meilleure attitude », « soyez positif ») qu'il est facile de combler par une bonne foi religieuse. La majorité des gens se sont demandé pourquoi « il avait souffert seul ». Pourquoi, effectivement? Pourquoi est-ce le cas de tellement d'autres? Pourquoi on continue de stigmatiser la dépression et d'y accorder si peu d'importance, malgré sa prévalence élevée?

La dépression unipolaire se classe au neuvième rang des causes principales des années de vie corrigées de l'incapacité perdue, selon les dernières estimations d'une étude de la charge globale de la maladie menée par l'Organisation mondiale de la santé (OMS) en 2010<sup>1</sup>. À l'échelle mondiale, la charge de cette maladie est plus élevée que celle du diabète ou de la tuberculose. Or, la TB et la malaria, dont les charges mondiales sont moins élevées, sont au nombre des maladies pour lesquelles des campagnes officielles de santé publique ont été lancées par l'OMS. Mais pas la dépression. Dans les pays à revenu élevé, seules la cardiopathie ischémique et l'accident vasculaire cérébral causent plus d'invalidité que la dépression unipolaire. Si la somme d'argent versée aux divers organismes de bienfaisance constitue une façon d'évaluer l'importance relative accordée aux problèmes de santé, alors la dépression figure au bas de la liste : dans le classement des organismes de bienfaisance canadiens par somme des dons, aucun organisme pour la santé mentale ne figure sur la liste des 10 plus importants<sup>2</sup>.

La charge de la dépression n'est pas uniquement fonction du coût élevé du traitement de cette maladie, mais résulte aussi de la perte de capacité fonctionnelle des personnes touchées, qui cause une baisse de leur productivité. Les répercussions sur les enfants et les êtres chers peuvent aussi être graves et de longue durée. Chez les patients atteints de dépression chronique, le risque de comorbidité est plus élevé et la fréquence des épisodes complique souvent des maladies physiques chroniques. De plus, la dépression touche autant les jeunes que les aînés, et elle a tendance à réapparaître plusieurs fois au cours de la vie d'une personne.

L'absence de traitements largement accessibles et efficaces contre la dépression constitue un grave problème. Selon des données récentes, les antidépresseurs utilisés sans autre traitement ne sont guère plus efficaces qu'un placebo chez beaucoup de personnes<sup>3</sup>. Les thérapies comportementales, notamment les théra-

pies cognitivo-comportementales, sont d'une efficacité moyenne et leurs effets sont durables, mais elles sont souvent difficiles à accéder, nécessitent du personnel bien formé, ne donnent de résultats qu'après un certain temps et sont associées à des taux d'abandon élevés<sup>4</sup>. On a prouvé invariablement que l'exercice physique est efficace à la fois dans le traitement et la prévention de la dépression, mais la motivation est un obstacle chez les personnes qui ont du mal à fonctionner au quotidien. Des interventions novatrices faisant intervenir l'activité physique en groupe et le soutien d'un compagnon peuvent être utiles, en plus de créer une interaction sociale obligatoire. Les traitements de neuro-modulation ont fait l'objet d'une étude publiée dans un numéro du *JAMC* l'an dernier<sup>5</sup>. La thérapie électroconvulsive, qui est très stigmatisée, en est un, mais il existe d'autres traitements par neuromodulation prometteurs dont l'efficacité à court et à moyen terme est éprouvée. Malheureusement, au Canada, peu de personnes y ont accès et le rapport coût-efficacité de leur utilisation dans les établissements de santé canadiens n'a pas été étudié. Une combinaison d'approches — idéalement un traitement sur mesure — pourrait être la solution la plus efficace. Les patients en découvrent eux-mêmes les mérites et partagent leurs expériences dans des forums et des blogs en ligne. Mais les politiques accusent un certain retard.

Nous ne sommes pas les seuls à nous demander pourquoi si peu d'importance est accordée à la maladie mentale à l'échelle mondiale, malgré les efforts concertés déployés au cours des dernières années pour combattre les stigmates de ces affections. Partout dans le monde, les professionnels de la santé admettent en principe qu'il n'y a pas de santé sans la santé mentale; pourtant, les progrès en matière de dépistage de la dépression et d'amélioration de l'accès aux traitements appropriés pour les patients déprimés sont lents. L'atténuation des répercussions de la dépression sur les proches de la personne atteinte ne suscite toujours pas beaucoup d'attention.

Au Canada, il faut cesser de percevoir la dépression comme une maladie aussi importante que les autres mais malgré tout négligée. Il faut soutenir financièrement la recherche qui peut faire une réelle différence pour les personnes atteintes. Le gouvernement fédéral doit s'engager à améliorer les infrastructures en santé mentale d'un bout à l'autre du pays. Les professionnels de la santé doivent être capables de fournir sans délai aux patients reconnus dépressifs un soutien et un traitement adéquats. Les programmes communautaires pourraient jouer un rôle important en comblant le manque de soutien et en compensant les délais de traitement et devraient être renforcés. Il faut mettre à niveau la formation de spécialistes en thérapie com-

portementale. Les mesures d'intervention axées sur l'exercice physique sont peu coûteuses à adopter et efficaces; mais à l'heure actuelle, elles sont sous-utilisées et ont besoin de soutien financier. La plupart des traitements de neuromodulation sont encore classés dans la catégorie « expérimentale »; les installations et le personnel bien formé sont rares et les coûts sont élevés. Pourtant, ces traitements efficaces ne devraient pas être réservés aux personnes atteintes d'une dépression réfractaire et de longue durée. Bien que des ressources considérables soient nécessaires, le coût élevé de la dépression pour les personnes atteintes, leurs familles et la société justifient les dépenses. Mais la nécessité de tels investissements ne sera reconnue comme prioritaire que lorsque tout le monde décidera d'accorder plus d'importance à la dépression.

## Références

1. Estimates for 2000–2012: Disease burden. Genève (Suisse) : Organisation mondiale de la santé; 2014. Disponible ici : [www.who.int/healthinfo/global\\_burden\\_disease/estimates/en/index2.html](http://www.who.int/healthinfo/global_burden_disease/estimates/en/index2.html) (consulté le 1<sup>er</sup> septembre 2014).
2. Canada's top 10 largest charities. Toronto : Charity Intelligence Canada; 2013. Disponible ici : [www.charityintelligence.ca/canadas-top-10-largest-charities](http://www.charityintelligence.ca/canadas-top-10-largest-charities) (consulté le 1<sup>er</sup> septembre 2014).
3. Fournier JC, DeRubeis RJ, Hollon SD et coll. Antidepressant drug effects and depression severity: a patient-level meta-analysis. *JAMA* 2010;303:47-53.
4. Hofmann SG, Asnaani A, Vonk JJ, et coll. The efficacy of cognitive behavioral therapy: a review of meta-analyses. *Cognit Ther Res* 2012;36:427-40.
5. Lipsman N, Sankar T, Downar J, et coll. Neuromodulation for treatment-refractory major depressive disorder. *CMAJ* 2014;186:33-9.

**Intérêts concurrents :** Se rendre à [www.cmaj.ca/site/misc/cmaj\\_staff.xhtml](http://www.cmaj.ca/site/misc/cmaj_staff.xhtml)

**Affiliations :** Kirsten Patrick est rédactrice adjointe du JAMC.

**Correspondance à :** Éditeur du JAMC, [pubs@cmaj.ca](mailto:pubs@cmaj.ca)

## RÉSUMÉS DE RECHERCHE

# Effet de la mélatonine sur l'incidence du délire dans les cas de fracture de la hanche : essai multicentrique à double insu, randomisé et contrôlé

Annemarieke de Jonghe MD PhD, Barbara C. van Munster MD PhD, J. Carel Goslings MD PhD, Peter Kloen MD PhD, Carolien van Rees MD, Reinder Wolvius MD, Romuald van Velde MD, Marcel Levi MD PhD, Rob J. de Haan PhD, Sophia E. de Rooij MD PhD; on behalf of the Amsterdam Delirium Study Group\*

Pour la version anglaise de ce résumé, veuillez consulter la page 1066.

**Intérêts concurrents :**  
Aucun déclaré.

Cet article a été revu par les pairs.

\*La liste des membres du Groupe d'étude d'Amsterdam sur le délire apparaît à la fin de l'article à [www.cmaj.ca/lookup/doi/10.1503/cmaj140495](http://www.cmaj.ca/lookup/doi/10.1503/cmaj140495).

**Correspondance à :**  
Annemarieke de Jonghe,  
[a.dejonghe@amc.uva.nl](mailto:a.dejonghe@amc.uva.nl)

**Contexte :** Les troubles du cycle veille-sommeil sont une caractéristique du délire. De plus, les fluctuations du rythme de la mélatonine influent sur le rythme circadien et sont aussi associés au délire. Nous avons comparé l'effet de la mélatonine et d'un placebo sur l'incidence et la durée des épisodes de délire.

**Méthodes :** Nous avons réalisé cet essai multicentrique à double insu, randomisé et contrôlé, entre novembre 2008 et mai 2012 dans 1 établissement universitaire et 2 établissements non universitaires. Les patients de 65 ans ou plus chez qui une chirurgie urgente de la hanche était prévue y étaient admissibles. Les patients ont reçu 3 mg de mélatonine ou un placebo le soir, pendant 5 jours consécutifs, débutant dans les 24 heures suivant leur admission. Le paramètre principal était l'incidence du délire dans les 8 jours suivant l'admission. Nous avons également observé la durée des épisodes de délire.

**Résultats :** En tout, 452 patients ont été assignés aléatoirement à l'un ou l'autre des 2 groupes de l'étude. Nous avons par la suite exclu 74 patients chez qui il était impossible de mesurer le

paramètre principal ou qui présentaient des épisodes de délire avant la deuxième journée de l'étude. Après ces exclusions post-randomisation, les données concernant 378 patients ont été incluses dans l'analyse principale. L'âge moyen global était de 84 ans, 238 (63,0 %) des patients vivaient à la maison avant leur admission et 210 (55,6 %) présentaient une atteinte cognitive. Nous n'avons observé aucun effet de la mélatonine sur l'incidence du délire : 55/186 (29,6 %) dans le groupe sous mélatonine c. 49/192 (25,5 %) dans le groupe sous placebo; différence 4,1 (intervalle de confiance de 95 % -0,05 à 13,1) points de pourcentage. Nous n'avons noté aucune différence entre les groupes pour ce qui est de la mortalité ou des paramètres cognitifs ou fonctionnels lors du suivi à 3 mois.

**Interprétation :** Chez cette population âgée, dans le contexte d'une fracture de la hanche, le traitement par mélatonine n'a pas réduit l'incidence du délire. Numéro d'enregistrement de l'essai : Registre des Pays-Bas, NTR1576 : Étude MAPLE (*Melatonin Against PLacebo in Elderly patients*); [www.trialregister.nl/trialreg/admin/rctview.asp?TC=1576](http://www.trialregister.nl/trialreg/admin/rctview.asp?TC=1576)
